# Supplementary figures and images for: Small RNA, Transcriptome and Degradome Analysis of the Transgenerational Heat Stress Response Network in Durum Wheat
Source: MDPI journal article supplement (doi:10.3390/ijms22115532), 2021-05-24

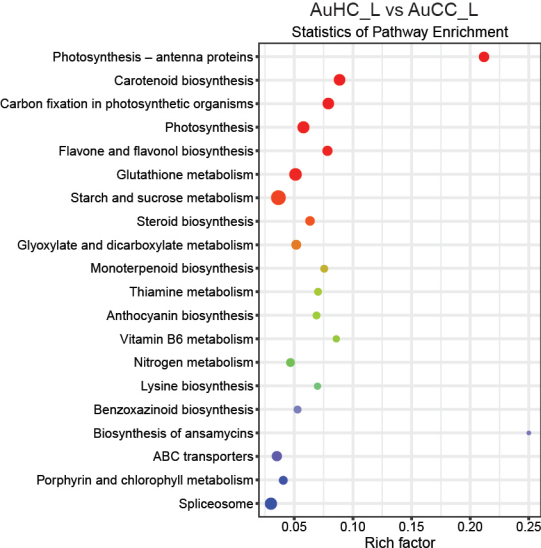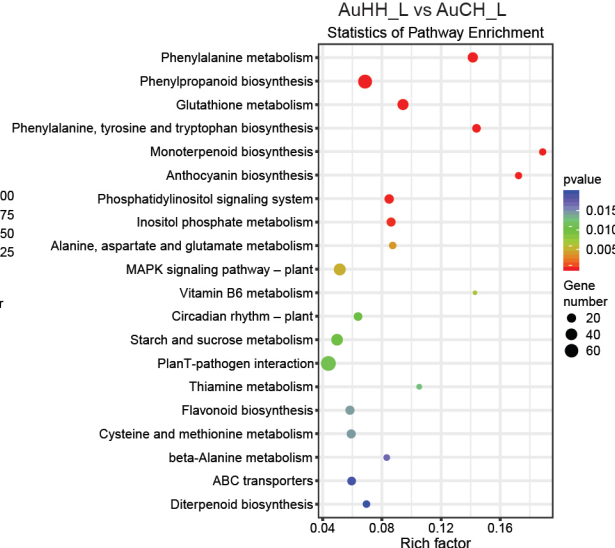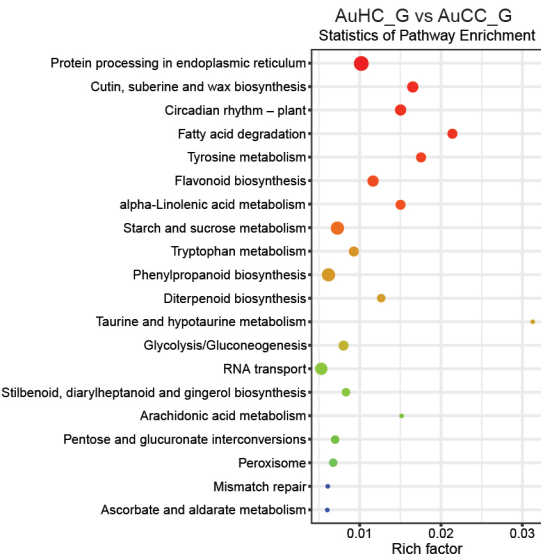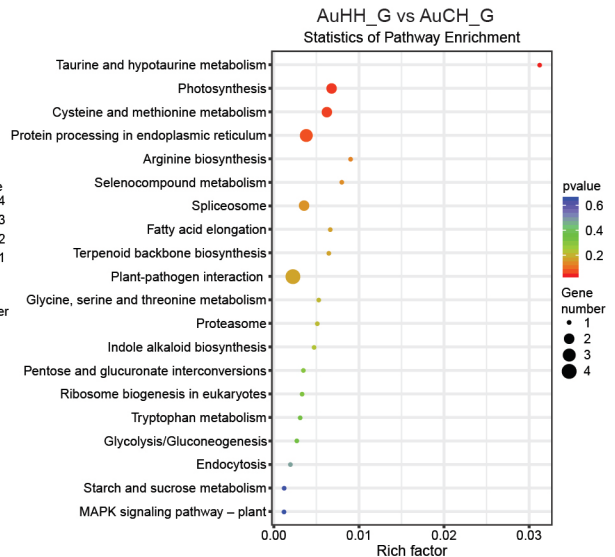

Supplement: s1 [file s1]
